# Supplementary material for: Envelope protein gene based molecular characterization of Japanese encephalitis virus clinical isolates from West Bengal, India: a comparative approach with respect to SA14-14-2 live attenuated vaccine strain
Source: PubMed Central journal article supplement (PMC3751164; doi:10.1186/1471-2334-13-368), 2013-08-08
Supplement: 1471-2334-13-368-S1.pdf [file 1471-2334-13-368-S1.pdf]

| Strains/isolates | Country and Year of isolation | Source      | Genotype | GenBank Accession no. |
|------------------|-------------------------------|-------------|----------|-----------------------|
| Nakayama         | Japan, 1935                   | Human brain | III      | U70413                |
| JaGAr01          | Japan, 1959                   | Mosquito    | III      | AF069076              |
| JaoArS982        | Japan, 1982                   | Mosquito    | III      | M18370                |
| Ishikawa         | Japan, 1998                   | Mosquito    | I        | AB051292              |
| JaNAr0102        | Japan, 2002                   | Mosquito    | I        | AY377577              |
| Fu               | Australia, 1995               | Human       | II       | AF217620              |
| WTP-70-22        | Malaysia, 1970                | Mosquito    | II       | U70421                |
| Muar             | Malaysia, 1952                | Human       | V        | HM596272              |
| PhAn1242         | Philippines, 1984             | Pig serum   | III      | U70417                |
| 691004           | Srilanka, 1969                | Human       | III      | Z34097                |
| H49778           | Srilanka, 1987                | Human       | III      | U70395                |
| DH20             | Nepal, 1985                   | Human       | III      | U03690                |
| VN118            | Vietnam, 1979                 | Mosquito    | III      | U70420                |
| K94P05           | Korea, 1994                   | Mosquito    | I        | AF045551              |
| KV1899           | Korea, 1999                   | Pig         | I        | AY316157              |
| K91P55           | Korea, 1991                   | Mosquito    | I        | U34928                |
| GP78             | India, 1978                   | Human       | III      | AF075723              |
| 733913           | India, 1973                   | Human brain | III      | Z34095                |
| P20778           | India, 1958                   | Human       | III      | Z34096                |
| R53567           | India, unavailable            | unavailable | III      | U70418                |
| 782219           | India, 1982                   | Human       | III      | U70402                |
| 826309           | India, 1982                   | Human brain | III      | U70403                |
| 014178           | India, 2001                   | Human blood | III      | EF623987              |
| 04940-4          | India, 2002                   | Mosquito    | III      | EF623989              |
| 057434           | India, 2005                   | Human blood | III      | EF623988              |
| 78124            | India, 1978                   | Human       | III      | U70387                |
| JEV-GKP-0945054  | India, 2009                   | Human CSF   | I        | HM156572              |
| P3               | China, 1949                   | Mosquito    | III      | U47032                |
| SA14             | China, 1958                   | Mosquito    | III      | U14163                |
| SA14-14-2        | China, unavailable            | Vaccine     | III      | D90195                |
| GZ04-36          | China, 2004                   | Mosquito    | III      | DQ404112              |
| XZ0934           | China, 2009                   | Mosquito    | V        | JF915894              |
| SH-53            | China, 2001                   | Mosquito    | I        | AY555757              |
| JKT1749          | Indonesia, 1979               | Mosquito    | II       | U70405                |
| JKT9092          | Indonesia, 1981               | Mosquito    | IV       | U70409                |
| JKT7003          | Indonesia, 1981               | Mosquito    | IV       | U70408                |
| JKT5441          | Indonesia, 1981               | Mosquito    | II       | U70406                |
| 2372             | Thailand, 1979                | Human       | I        | U70401                |
| Chiang Mai       | Thailand, 1964                | Human       | III      | U70393                |
| HK8256           | Taiwan, 1972                  | Mosquito    | III      | U03691                |

| Strains/isolates  | Country and Year of isolation               | Source      | Genotype | GenBank Accession no. |
|-------------------|---------------------------------------------|-------------|----------|-----------------------|
| IND/11/WB/JEV45   | Midnapore, West Bengal, India, 2011         | Human CSF   | I        | KC526872              |
| IND/11/WB/JEV46*  | Midnapore, West Bengal, India, 2011         | Human CSF   | III      | KC526869              |
| IND/11/WB/JEV47   | Hooghly, West Bengal, India, 2011           | Human serum | III      | KC526870              |
| IND/11/WB/JEV48*  | South 24 Parganas, West Bengal, India, 2011 | Human CSF   | III      | KC802020              |
| IND/11/WB/JEV49*  | Howrah, West Bengal, India, 2011            | Human serum | III      | KC802021              |
| IND/12/WB/JEV50** | Malda, West Bengal, India, 2012             | Human CSF   | III      | KC526871              |
| IND/12/WB/JEV51** | Birbhum, West Bengal, India, 2012           | Human serum | III      | KC802022              |
| MVEV-1-51         | Australia, 1951                             | Human       | -        | AF161266              |

#### **Additional file 1:**

All strains/isolates are JEV, except Murray Valley encephalitis virus strain (MVE-1-51) used as an out group for phylogenetic analysis in this study.

\*/\*\* Isolates were 100% identical with each other.
