# Supplementary material for: Envelope protein gene based molecular characterization of Japanese encephalitis virus clinical isolates from West Bengal, India: a comparative approach with respect to SA14-14-2 live attenuated vaccine strain
Source: PubMed Central journal article supplement (PMC3751164; doi:10.1186/1471-2334-13-368), 2013-08-08
Supplement: 1471-2334-13-368-S3.pdf [file 1471-2334-13-368-S3.pdf]

### Additional file 3

| Sl. No. | Amino acid substitutions positions in E protein | HLA-B alleles               |                             |                             |                             |                             |          |            |
|---------|-------------------------------------------------|-----------------------------|-----------------------------|-----------------------------|-----------------------------|-----------------------------|----------|------------|
|         |                                                 | HLA-B*07                    | HLA-B*27                    | HLA-B*40                    | HLA-B*44                    | HLA-B*51                    | HLA-B*53 | HLA-B*3501 |
| 1       | N2H                                             | -                           | -                           | -                           | -                           | -                           | -        | -          |
| 2       | N8H                                             | -                           | -                           | -                           | -                           | -                           | -        | -          |
| 3       | S64T                                            | -                           | <b>VRSYCYHAT</b><br>(1.394) | -                           | -                           | -                           | -        | -          |
| 4       | N103K                                           | -                           | -                           | -                           | -                           | -                           | -        | -          |
| 5       | F107L                                           | -                           | -                           | -                           | -                           | <b>CGLFGKGS</b><br>(76.03)  | -        | -          |
| 6       | S123R                                           | -                           | <b>TRKAIGRTI</b><br>(1.277) | -                           | -                           | -                           | -        | -          |
| 7       | K138E                                           | -                           | -                           | -                           | -                           | -                           | -        | -          |
| 8       | Q158P                                           | -                           | -                           | -                           | -                           | -                           | -        | -          |
| 9       | V176I                                           | <b>TPNAPSITL</b><br>(3.11)  | -                           | -                           | -                           | <b>TPNAPSITL</b><br>(62.95) | -        | -          |
| 10      | A177T                                           | <b>TPNAPSITL</b><br>(3.11)  | -                           | -                           | -                           | <b>TPNAPSITL</b><br>(62.95) | -        | -          |
| 11      | A222S                                           | -                           | -                           | <b>REWFHDLSL</b><br>(1.376) | <b>REWFHDLSL</b><br>(1.376) | -                           | -        | -          |
| 12      | G244E                                           | -                           | -                           | -                           | -                           | -                           | -        | -          |
| 13      | G261S                                           | -                           | -                           | -                           | -                           | -                           | -        | -          |
| 14      | H264Q                                           | -                           | -                           | -                           | -                           | <b>QALAGAIVV</b><br>(82.79) | -        | -          |
| 15      | M279K                                           | <b>SVKLTSGHL</b><br>(75.86) | -                           | <b>VEYSSSVKL</b><br>(1.505) | <b>VEYSSSVKL</b><br>(1.505) | -                           | -        | -          |
| 16      | E306G                                           | -                           | -                           | -                           | -                           | -                           | -        | -          |
| 17      | A311R                                           | -                           | <b>FRKNPADTG</b><br>(1.471) | -                           | -                           | -                           | -        | -          |
| 18      | V315A                                           | -                           | -                           | -                           | -                           | -                           | -        | -          |
|         | S327Q                                           | -                           | -                           | -                           | -                           | -                           | -        | -          |
| 19      | S327T                                           | -                           | -                           | -                           | -                           | -                           | -        | -          |
| 20      | S329T                                           | -                           | -                           | -                           | -                           | <b>TGSDGPCKI</b><br>(3.24)  | -        | -          |
| 21      | S331K                                           | -                           | -                           | -                           | -                           | <b>TGKDGPKCI</b><br>(19.41) | -        | -          |
| 22      | A366S                                           | -                           | -                           | <b>TSSNSKVL</b><br>(0.622)  | <b>TSSNSKVL</b><br>(0.622)  | -                           | -        | -          |
| 23      | V372L                                           | -                           | -                           | -                           | -                           | -                           | -        | -          |
| 24      | M374I                                           | -                           | -                           | -                           | -                           | -                           | -        | -          |
|         | G388E                                           | -                           | <b>GREDKQINH</b><br>(1.656) | -                           | -                           | -                           | -        | -          |
| 25      | G388K                                           | <b>VVGRKDKQI</b><br>(45.19) | <b>GRKDKQINH</b><br>(1.672) | -                           | -                           | -                           | -        | -          |
| 26      | D389E                                           | -                           | <b>GRGEKQINH</b><br>(1.660) | <b>GEKQINHHW</b><br>(1.094) | <b>GEKQINHHW</b><br>(1.094) | -                           | -        | -          |
| 27      | W396R                                           | -                           | -                           | -                           | -                           | -                           | -        | -          |
| 28      | R416K                                           | -                           | -                           | -                           | -                           | -                           | -        | -          |
| 29      | G432R                                           | -                           | -                           | -                           | -                           | -                           | -        | -          |
| 30      | R439K                                           | -                           | -                           | -                           | -                           | -                           | -        | -          |
| 31      | L463R                                           | -                           | -                           | -                           | -                           | -                           | -        | -          |
| 32      | L467E                                           | -                           | -                           | -                           | -                           | -                           | -        | -          |
| 33      | A481D                                           | -                           | -                           | -                           | -                           | -                           | -        | -          |

The values given within the bracket indicates the 50% inhibitory concentration (IC50) of the peptide, a measure of the binding affinity. An IC50 value < 50 is considered as a good affinity. Amino acid substitutions in the predicted epitopes of E protein are marked as bold.
