# Supplementary material for: Envelope protein gene based molecular characterization of Japanese encephalitis virus clinical isolates from West Bengal, India: a comparative approach with respect to SA14-14-2 live attenuated vaccine strain
Source: PubMed Central journal article supplement (PMC3751164; doi:10.1186/1471-2334-13-368), 2013-08-08
Supplement: 1471-2334-13-368-S4.pdf [file 1471-2334-13-368-S4.pdf]

Additional file 4

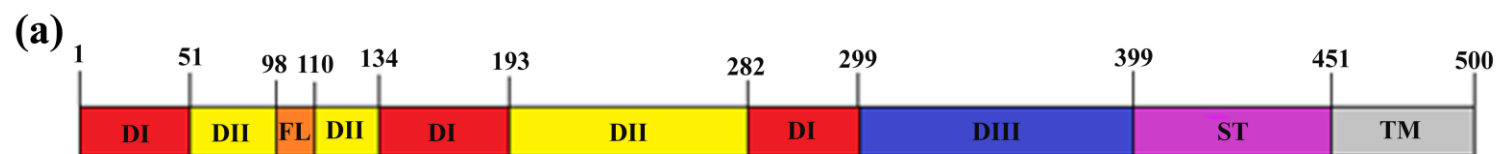

(b)

|                          |                                                                     |     |
|--------------------------|---------------------------------------------------------------------|-----|
| KC526872/IND/11/WB/JEV45 | <b>FHCLGMGNRDFIEGASGATWVDLVLEGDSCLTIMANDKPTLDVRMINIEASQLAEVRSYC</b> | 60  |
|                          | CCCCCCCCCEEEEECCCCCEEEEEEECCCEEEEEEECCCCEEEEEEEEEEEEECEEEEEEE       |     |
| KC526869/IND/11/WB/JEV46 | <b>FHCLGMGNRDFIEGASGATWVDLVLEGDSCLTIMANDKPTLDVRMINIEASQLAEVRSYC</b> | 60  |
|                          | CCCCCCCCCEEEEECCCCCEEEEEEECCCEEEEEEECCCCEEEEEEEEEEEEECEEEEEEE       |     |
| KC526870/IND/11/WB/JEV47 | <b>FHCLGMGHRDFIEGASGATWVDLVLEGDSCLTIMANDKPTLDVRMINIEASQLAEVRSYC</b> | 60  |
|                          | CCCCCCCCCEEEEECCCCCEEEEEEECCCEEEEEEECCCCEEEEEEEEEEEEECEEEEEEE       |     |
| KC526871/IND/12/WB/JEV50 | <b>FHCLGMGNRDFIEGASGATWVDLVLEGDSCLTIMANDKPTLDVRMINIEASQLAEVRSYC</b> | 60  |
|                          | CCCCCCCCCEEEEECCCCCEEEEEEECCCEEEEEEECCCCEEEEEEEEEEEEECEEEEEEE       |     |
| D90195/SA14-14-2         | <b>FNCLGMGNRDFIEGASGATWVDLVLEGDSCLTIMANDKPTLDVRMINIEASQLAEVRSYC</b> | 60  |
|                          | CCCCCCCCCEEEEECCCCCEEEEEEECCCEEEEEEECCCCEEEEEEEEEEEEECEEEEEEE       |     |
|                          |                                                                     |     |
| KC526872/IND/11/WB/JEV45 | <b>YHASVTDISTVARCPTTGEAHNEKRADSSYVCKQGFTDRGWGKGCGLFGKGSIDTCAKFS</b> | 120 |
|                          | EEEEEEEEEEEEEECCCCCCCCCHHHHCCCEEEEEEEEEEECHHHCCCCCEEEEEEEEEEEEE     |     |
| KC526869/IND/11/WB/JEV46 | <b>YHASVTDISTVARCPTTGEAHNEKRADSSYVCKQGFTDRGWGNGCGLFGKGSIDTCAKFS</b> | 120 |
|                          | EEEEEEEEEEEEEECCCCCCCCCHHHHCCCEEEEEEEEEEECHHHCCCCCEEEEEEEEEEEEE     |     |
| KC526870/IND/11/WB/JEV47 | <b>YHATVTDISTVARCPTTGEAHNEKRADSSYVCKQGFTDRGWGNGCGLFGKGSIDTCAKFS</b> | 120 |
|                          | EEEEEEEEEEEEEECCCCCCCCCHHHHCCCEEEEEEEEEEECHHHCCCCCEEEEEEEEEEEEE     |     |
| KC526871/IND/12/WB/JEV50 | <b>YHASVTDISTVARCPTTGEAHNEKRADSSYVCKQGFTDRGWGNGCGLFGKGSIDTCAKFS</b> | 120 |
|                          | EEEEEEEEEEEEEECCCCCCCCCHHHHCCCEEEEEEEEEEECHHHCCCCCEEEEEEEEEEEEE     |     |
| D90195/SA14-14-2         | <b>YHASVTDISTVARCPTTGEAHNEKRADSSYVCKQGFTDRGWGNGCGFFGKGSIDTCAKFS</b> | 120 |
|                          | EEEEEEEEEEEEEECCCCCCCCCHHHHCCCEEEEEEEEEEECHHHCCCCCEEEEEEEEEEEEE     |     |

Glycosylation site

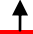

KC526872/IND/11/WB/JEV45 CTSKAIGRTIQPENIKYE**EV**GI**FV**HGTTTSENHGN**YSAQ**VGASQA**AKFTVTPNAPSITLKL** 180  
EEEEEEEEECCHHHEEEEEEEEEEECCCCCCCCCCHHHHHHCCCCEEEEECCCCCEEEEE  
KC526869/IND/11/WB/JEV46 CTSKAIGRTIQPENIKYE**EV**GI**FV**HGTTTSENHGN**YSAQ**VGASQA**AKFTVTPNAPSITLKL** 180  
EEEEEEEEECCHHHEEEEEEEEEEECCCCCCCCCCHHHHHHCCCCEEEEECCCCCEEEEE  
KC526870/IND/11/WB/JEV47 **CTR**KAIGRTIQPENIKYE**EV**GI**FV**HGTTTSENHGN**YSAQ**VGASQA**AKFTVTPNAPSITLKL** 180  
EEEEEEEEECCHHHEEEEEEEEEEECCCCCCCCCCHHHHHHCCCCEEEEECCCCCEEEEE  
KC526871/IND/12/WB/JEV50 CTSKAIGRTIQPENIKYE**EV**GI**FV**HGTTTSENHGN**YSAQ**VGASQA**AKFTVTPNAPSITLKL** 180  
EEEEEEEEECCHHHEEEEEEEEEEECCCCCCCCC**CHHHH**CCCCEEEEECCCCCEEEEE  
D90195/SA14-14-2 CTSKAIGRTIQPENIKY**KV**GI**FV**HGTTTSENHGN**YSAQ**VGASQA**AKFTVTPNAPSV**ALKL 180  
EEEEEEEEECCHHHEEEEEEEEEEECCCCCCCCCCHHHHHHCCCCEEEEECCCCCEEEEE

KC526872/IND/11/WB/JEV45 GDYGEVTL**DCEPR**SGLNTEAFYVMTVGSKS**FV**HREWFHD**L**SLPWTSPSSTAWRNRELLM 240  
CCEEEEEEEECCCCCCCCCEEEEECEEEEEEEHHHHHHCCCCECCCCCECHHHCE  
KC526869/IND/11/WB/JEV46 GDYGEVTL**DCEPR**SGLNTEAFYVMTVGSKS**FV**HREWFHD**L**ALPWTSPSSTAWRNRELLM 240  
CCEEEEEEEECCCCCCCCCEEEEECEEEEEEEHHHHHHCCCCECCCCCECHHHCE  
KC526870/IND/11/WB/JEV47 GDYGEVTL**DCEPR**SGLNTEAFYVMTVGSKS**FV**HREWFHD**L**ALPWTSPSSTAWRNRELLM 240  
CCEEEEEEEECCCCCCCCCEEEEECEEEEEEEHHHHHHCCCCECCCCCECHHHCE  
KC526871/IND/12/WB/JEV50 GDYGEVTL**DCEPR**SGLNTEAFYVMTVGSKS**FV**HREWFHD**L**ALPWTSPSSTAWRNRELLM 240  
CCEEEEEEEECCCCCCCCCEEEEECEEEEEEEHHHHHHCCCCECCCCCECHHHCE  
D90195/SA14-14-2 GDYGEVTL**DCEPR**SGLNTEAFYVMTVGSKS**FV**HREWFHD**L**ALPWTSPSSTAWRNRELLM 240  
CCEEEEEEEECCCCCCCCCEEEEECEEEEEEEHHHHHHCCCCECCCCCECHHHCE

KC526872/IND/11/WB/JEV45 E**FE**E**A**HATKQSVVALGSQ**E**GS**LH**QALAGAI**V**VEYSSSV**K**L**T**S**G**HLK**R**LKMDKLAL**K**G**T** 300  
EECCCCCCCCCEEECCCCHHHHHHCCCCEEECCCCCECCCCCEEEEEEECCCCCCCC  
KC526869/IND/11/WB/JEV46 E**FE**E**A**HATKQSVVALGSQ**E**GS**LH**QALAGAI**V**VEYSSSV**K**L**T**S**G**HLK**R**LKMDKLAL**K**G**T** 300  
EECCCCCCCCCEEECCCCHHHHHHCCCCEEECCCCCECCCCCEEEEEEECCCCCCCC  
KC526870/IND/11/WB/JEV47 E**FE**E**A**HATKQSVVALGSQ**E**GS**LH**QALAGAI**V**VEYSSSV**K**L**T**S**G**HLK**R**LKMDKLAL**K**G**T** 300  
EECCCCCCCCCEEECCCCHHHHHHCCCCEEECCCCCECCCCCEEEEEEECCCCCCCC  
KC526871/IND/12/WB/JEV50 E**FE**E**A**HATKQSVVALGSQ**E**GS**LH**HALAGAI**V**VEYSSSV**K**L**T**S**G**HLK**R**LKMDKLAL**K**G**T** 300  
EECCCCCCCCCEEECCCCHHHHHHCCCCEEECCCCCECCCCCEEEEEEECCCCCCCC  
D90195/SA14-14-2 E**FE**G**A**HATKQSVVALGSQ**E**GG**LH**HALAGAI**V**VEYSSSV**M**L**T**S**G**HLK**R**LKMDKLAL**K**G**T** 300  
EECCCCCCCCCEEECCCCHHHHHHCCCCEEECCCCCECCCCCEEEEEEECCCCCCCC



|                          |                              |     |
|--------------------------|------------------------------|-----|
| KC526872/IND/11/WB/JEV45 | ALAFLATGGVLVFLATNVHA         | 500 |
|                          | EEEEHHHHHEEEEECECCC          |     |
| KC526869/IND/11/WB/JEV46 | ALAFLATGGVLVFLATNVHA         | 500 |
|                          | EEEEHHHHHEEEEECECCC          |     |
| KC526870/IND/11/WB/JEV47 | <b>D</b> LAFLATGGVLVFLATNVHA | 500 |
|                          | EEEEHHHHHEEEEECECCC          |     |
| KC526871/IND/11/WB/JEV50 | ALAFLATGGVLVFLATNVHA         | 500 |
|                          | EEEEHHHHHEEEEECECCC          |     |
| D90195/SA14-14-2         | ALAFLATGGVLVFLATNVHA         | 500 |
|                          | EEEEHHHHHEEEEECECCC          |     |
